# Supplementary material for: Tunable high-κ ZrxAl1−xOy thin film dielectrics from all-inorganic aqueous precursor solutions
Source: Royal Society of Chemistry journal article supplement (doi:10.1039/c7ra08362a), 2017-01-01
Supplement: c7ra08362a1.pdf [file c7ra08362a1.pdf]

**Electronic Supplementary Information:**

**Tunable high- $\kappa$   $Zr_xAl_{1-x}O_y$  thin film dielectrics from all-inorganic aqueous precursor solutions**

K. N. Woods, E. C. Waddington, C. A. Crump, E. A. Bryan, T. S. Gleckler, M. R. Nellist, B. A. Duell, D. P. Nguyen, S. W. Boettcher and C. J. Page\*

Department of Chemistry and Biochemistry, Materials Science Institute, University of Oregon, Eugene, OR 97403, USA

\*E-mail: [cpage@uoregon.edu](mailto:cpage@uoregon.edu)

**Figure S1: Fourier transform infrared spectroscopy (FTIR) for ZAO films annealed at 300 and 400 °C**

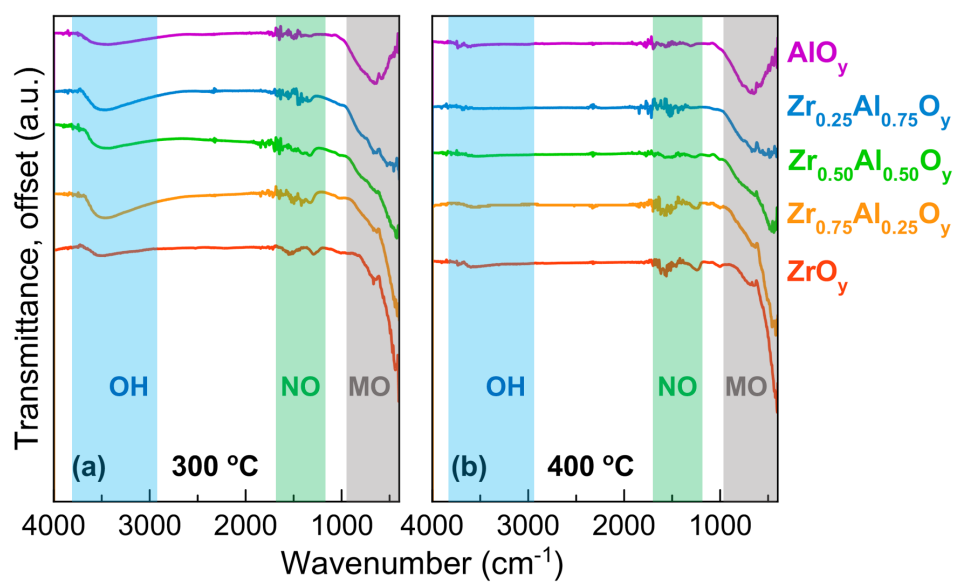

**Fig. S1** FTIR spectra of two-coat ZAO films annealed at (a) 300 °C and (b) 400 °C.

**Figure S2: X-ray reflectivity (XRR) spectra and best fit models for ZAO films annealed at 500 °C**

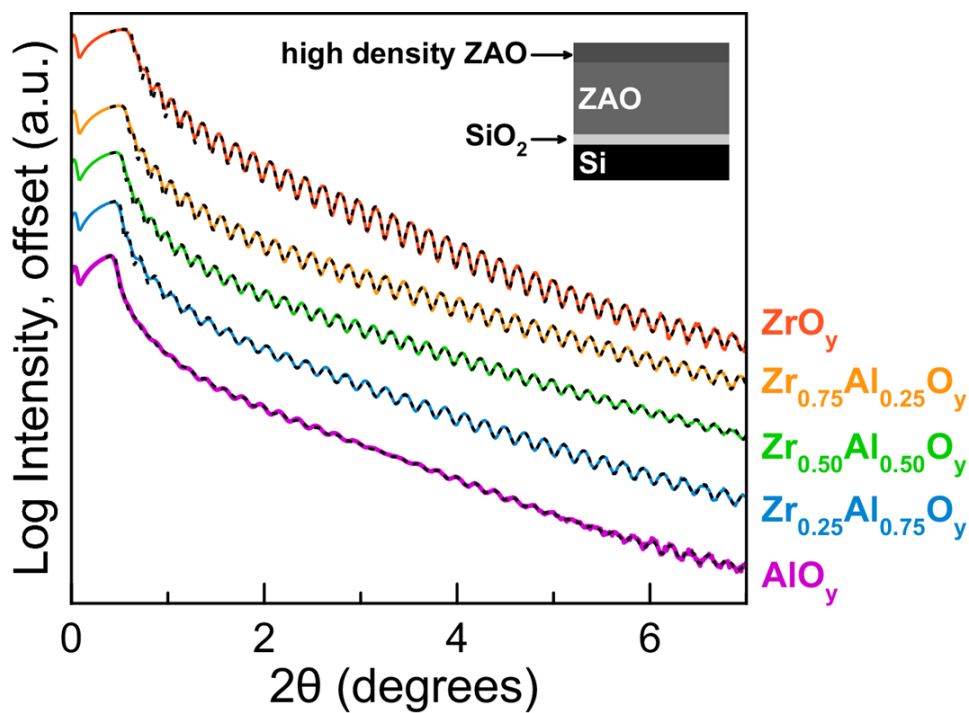

**Fig. S2** Representative XRR spectra for single-coat ZAO films annealed at 500 °C (solid, colored) and overlaid best fit models (dashed, black). Best fit models were generated using a two-layer model consisting of a thin (~1-3 nm) capping layer over an underlying bulk layer of different density, consistent with models employed in previous XRR studies on aqueous-derived metal oxides.<sup>1,2</sup>

**Figure S3: Film thickness and density of ZAO films extracted from XRR best fit models**

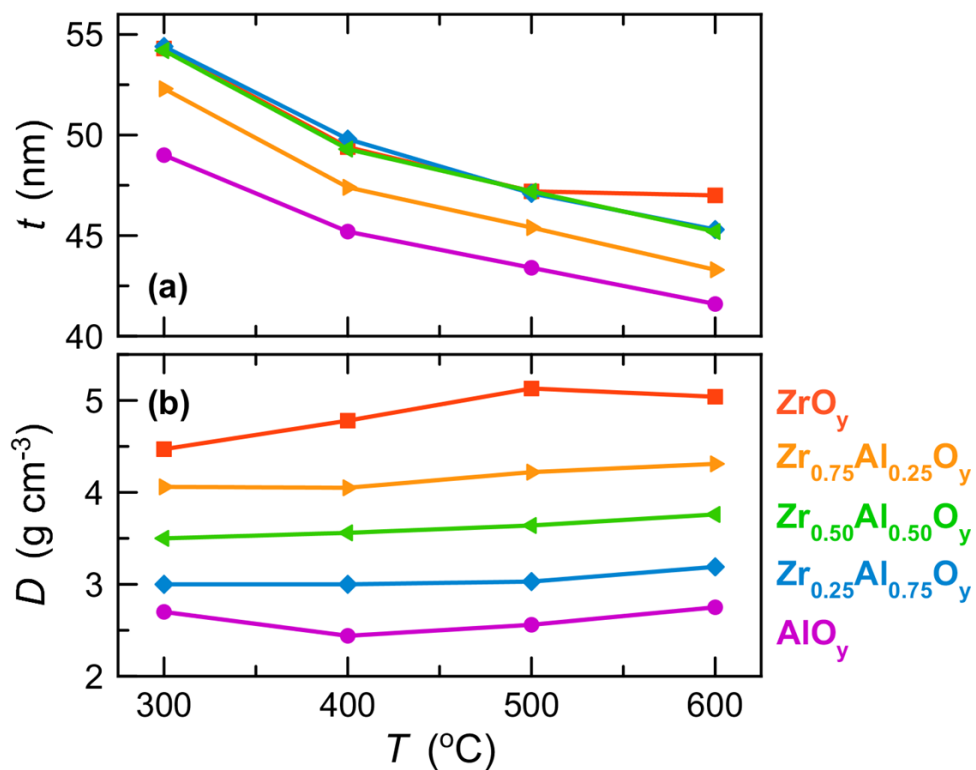

**Fig. S3** (a) Film thickness [ $t$ ] and (b) density [ $D$ ] of single-coat ZAO films extracted from XRR best fit, two-layer models. Small differences in film thickness between compositions are attributed to small differences in the humidity of the spin-coating chamber during deposition.<sup>3</sup> Density values are calculated from a weighted average of the capping and bulk layer densities.

**Figure S4: Dielectric constant dispersion**

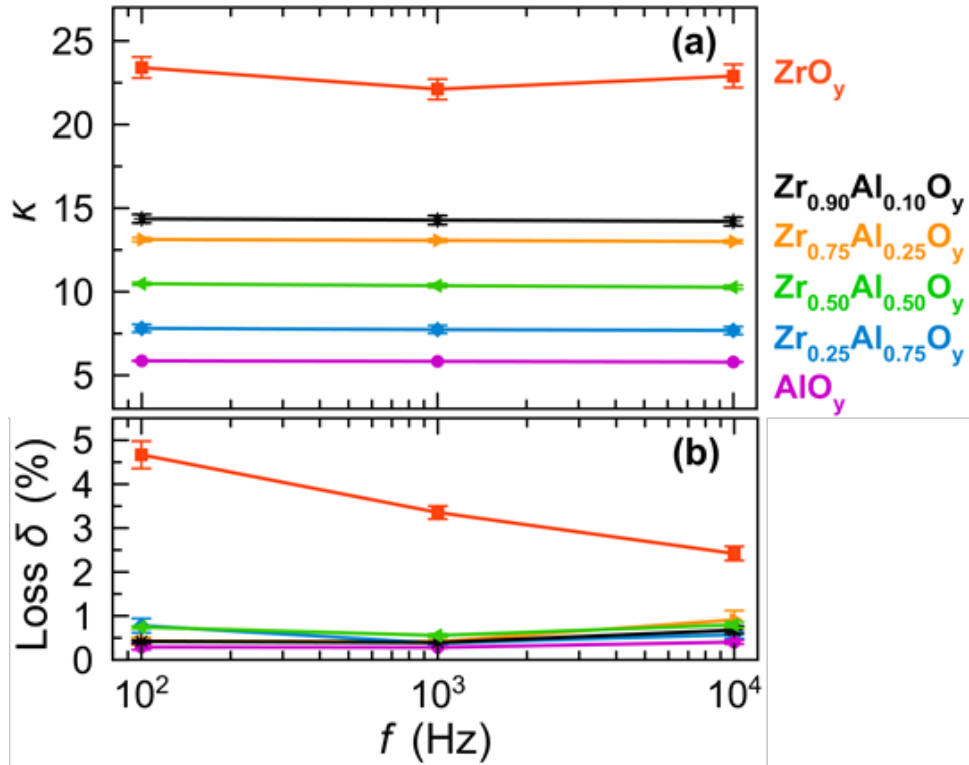

**Fig. S4** (a) Dielectric constants [ $\kappa$ ] as a function of frequency [ $f$ ] for ZAO-based MIS devices and (b) corresponding loss tangents [ $\text{loss } \delta$ ] as a function of  $f$ . MIS devices were fabricated from two-coat ( $\sim 100$  nm) ZAO films annealed at  $500^\circ\text{C}$ . Error bars were determined using measurements taken from three separate batches of MIS devices.

## References

- 1 K. C. Fairley, D. R. Merrill, K. N. Woods, J. Ditto, C. Xu, R. P. Oleksak, T. Gustafsson, D. W. Johnson, E. L. Garfunkel, G. S. Herman, D. C. Johnson and C. J. Page, *ACS Appl. Mater. Interfaces*, 2016, **8**, 667–672.
- 2 K. N. Woods, T.-H. Chiang, P. N. Plassmeyer, M. G. Kast, A. C. Lygo, A. K. Grealish, S. W. Boettcher and C. J. Page, *ACS Appl. Mater. Interfaces*, 2017, **9**, 10897–10903.
- 3 P. N. Plassmeyer, G. Mitchson, K. N. Woods, D. C. Johnson and C. J. Page, *Chem. Mater.*, 2017, **29**, 2921–2926.
